# Supplementary material for: The Sorghum bicolor Root Exudate Sorgoleone Shapes Bacterial Communities and Delays Network Formation
Source: PubMed Central journal article supplement (PMC8546980; doi:10.1128/msystems.00749-20), 2021-03-16

(a)

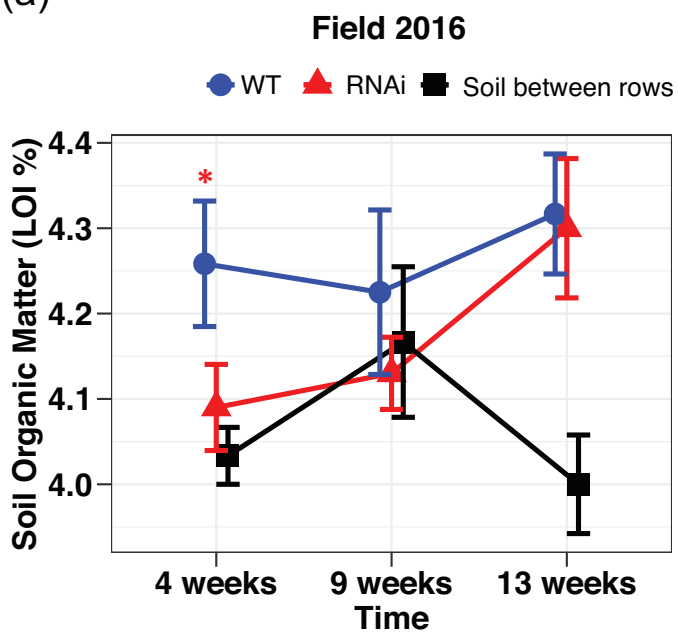

(b)

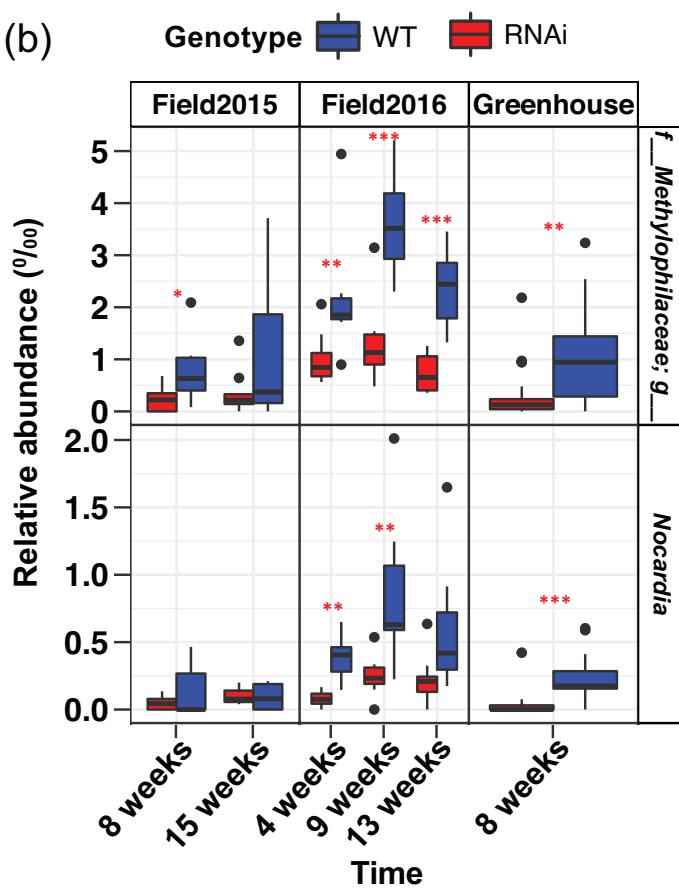

Supplement: msystems.00749-20-sf003.pdf [file msystems.00749-20-sf003.pdf]
